# Supplementary material for: Direct observation of enhanced plasmon-driven catalytic reaction activity of Au nanoparticles supported on reduced graphene oxides by SERS
Source: Royal Society of Chemistry journal article supplement (doi:10.1039/c5cp00908a), 2015-01-01
Supplement: c5cp00908a1.pdf [file c5cp00908a1.pdf]

Supporting Information for: **Direct observation of enhanced plasmon-driven catalytic activity of Au nanoparticles supported on reduced graphene oxides by SERS**

Xiu Liang,<sup>a</sup> Tingting You,<sup>a</sup> Xiufeng Lang,<sup>b</sup> Dapeng Liu,<sup>a</sup> Enzhong Tan,<sup>c</sup> Jihua Shi,<sup>a</sup> Penggang Yin,<sup>\*a</sup> and Lin Guo<sup>\*a</sup>

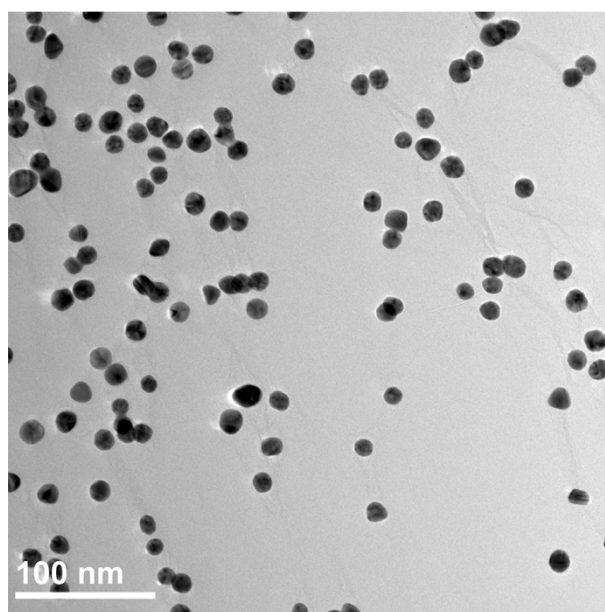

Fig.S1 TEM image of Au/rGO nanocomposite.

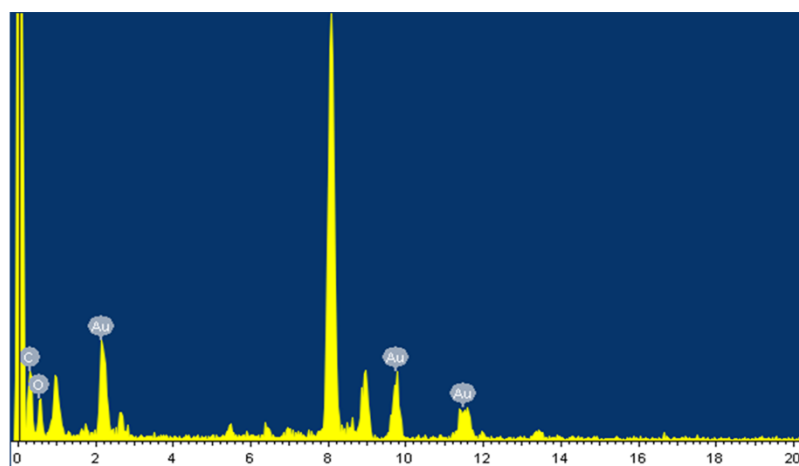

Fig.S2 EDX spectrum of Au/rGO nanocomposites.

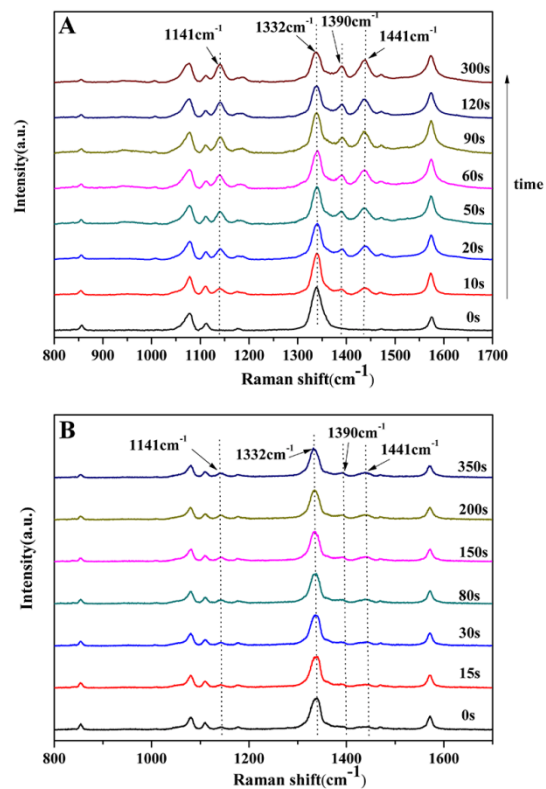

**Fig.S3** Time-dependent SERS Spectrum acquired for Au/rGO (A) and Au NPs (B) functionalized with 4-NBT employing 1.2 mW as the laser irradiation power. The spectra were recorded under 647nm excitation.

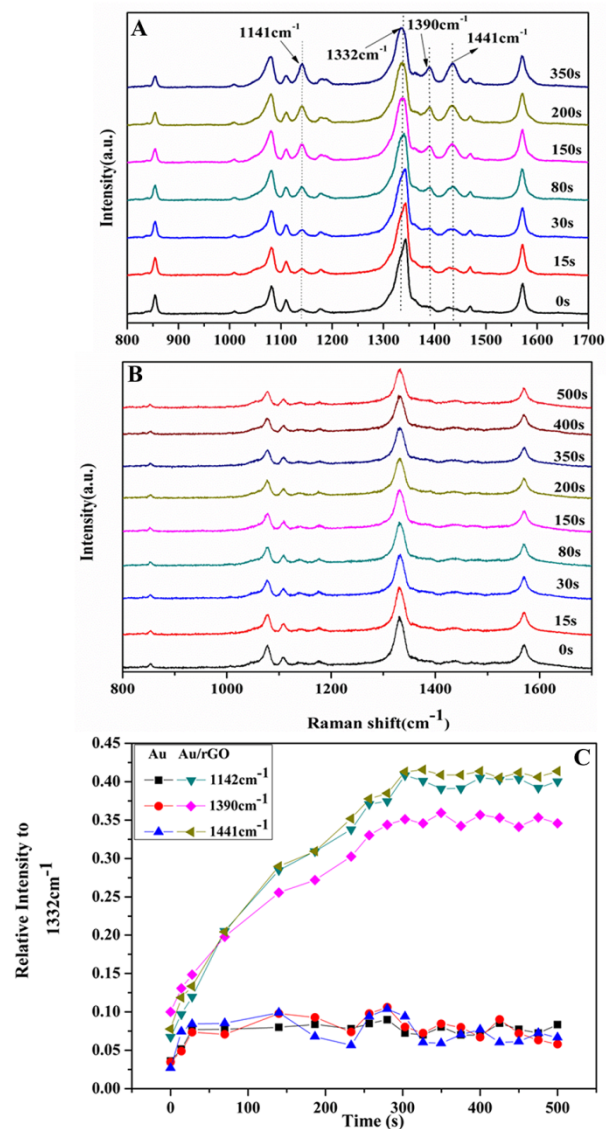

**Fig.S4** Time-dependent SERS Spectrum acquired for Au/rGO (A) and Au NPs (B) functionalized with 4-NBT employing 0.4 mW as the laser irradiation power. The spectra were recorded under 647nm excitation. (C) Corresponding relative Raman intensity of bands at 1141, 1390 and 1441 cm<sup>-1</sup> to 1332 cm<sup>-1</sup> under excitation with a laser power of 0.4 mW on Au/rGO and Au NPs.

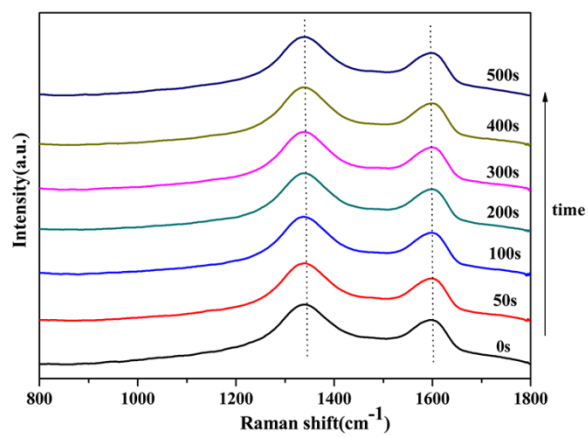

**Fig.S5** Time-dependent SERS Spectrum acquired for GO functionalized with 4-NBT employing 4mW as the laser irradiation power. The spectra were recorded under 647 nm excitation..
